# Supplementary material for: Fast and Non-Toxic In Situ Hybridization without Blocking of Repetitive Sequences
Source: PubMed Central journal article supplement (PMC3404051; doi:10.1371/journal.pone.0040675), 2012-07-24
Supplement: pone.0040675.s003.pdf [file pone.0040675.s003.pdf]

**A**

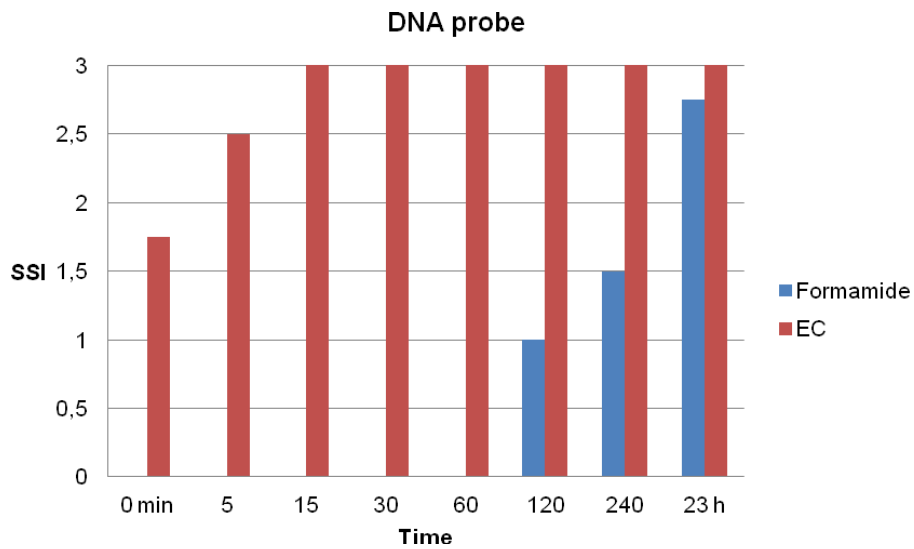

**B**

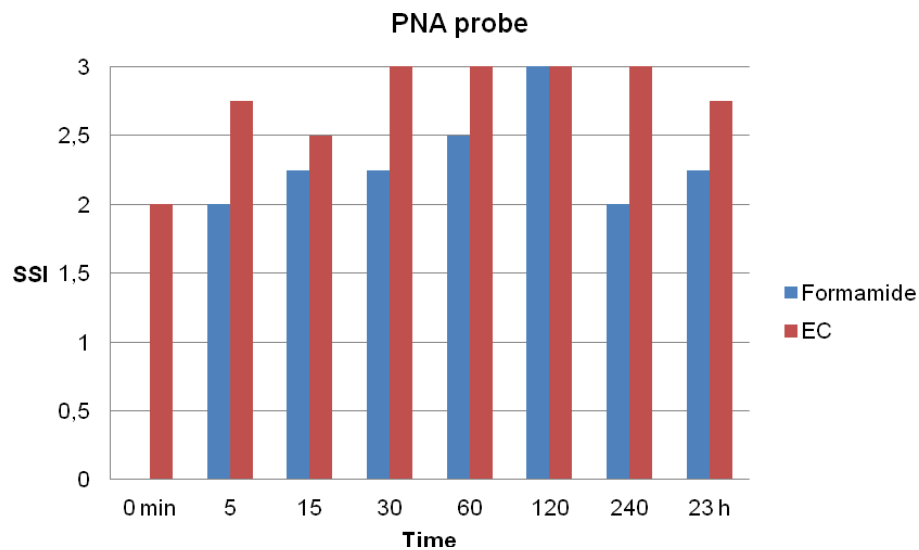

**Figure S3. Manual scoring of signal intensities in time-chase experiments using formamide and ethylene carbonate buffers. A: *HER2* DNA probe. B: CEN-17 PNA probe. SSI, Scored Signal Intensity.**

The signal intensities were evaluated on a 0–3 scale. Score: 0, no signal; 1, weak signal intensity; 2, moderate signal intensity; 3, strong signal intensity. Between 0 and 3, additional grades 0.5 apart were used by the observer to assess signal intensity.
