# Supplementary material for: Fast and Non-Toxic In Situ Hybridization without Blocking of Repetitive Sequences
Source: PubMed Central journal article supplement (PMC3404051; doi:10.1371/journal.pone.0040675), 2012-07-24
Supplement: pone.0040675.s004.pdf [file pone.0040675.s004.pdf]

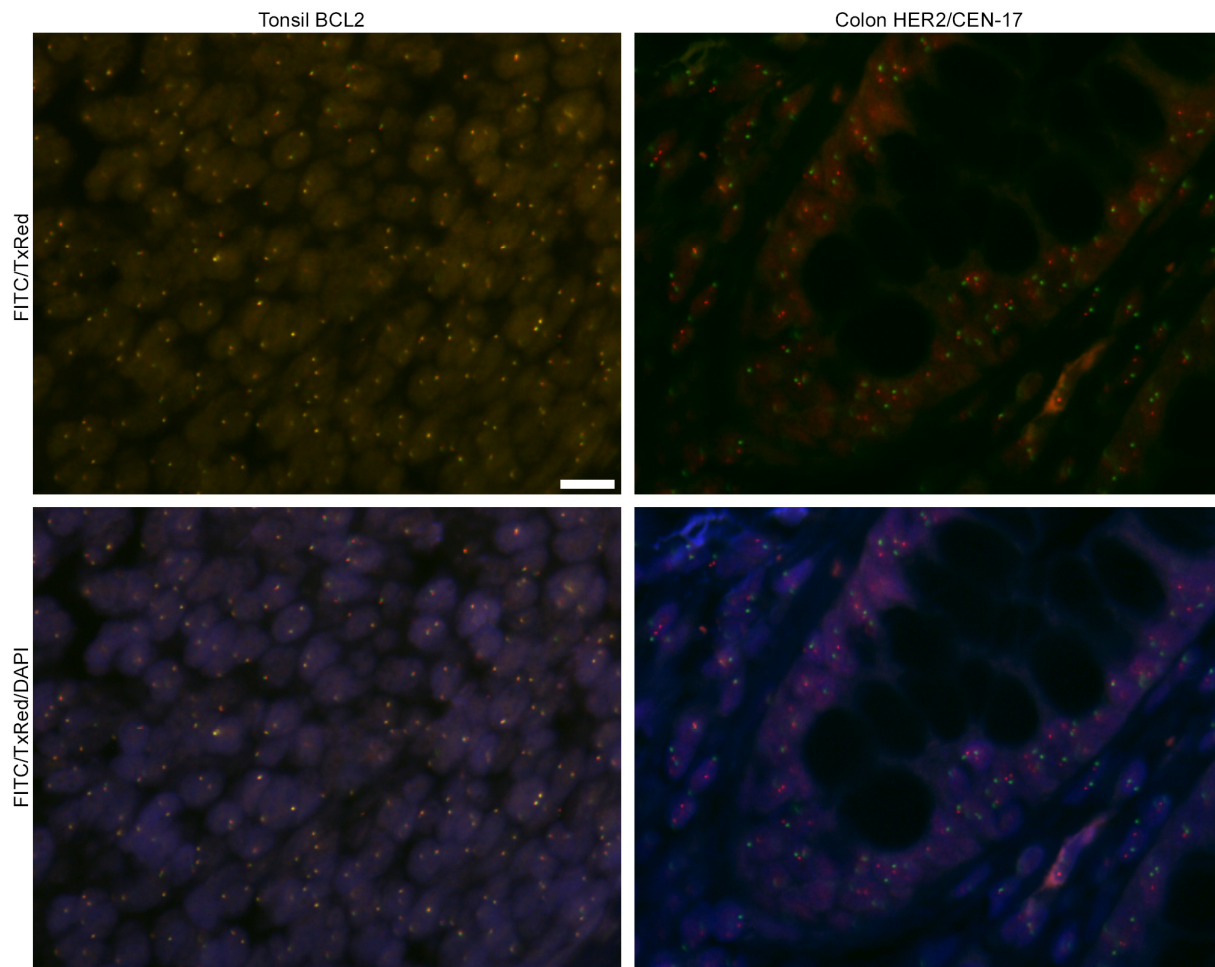

**Figure S4. Examples of FISH on different FFPE tissue sections using EC buffer.** *BCL2* and *HER2/CEN-17* probe in 15% EC buffer on FFPE tonsil and colon tissue sections. Denaturation at 67°C for 10 minutes and hybridization at 45°C for 60 minutes. No Cot-1 blocking. FITC/TxRed, merge of green and red *BCL2* DNA split probe signals. Merge of red *HER2* DNA probe signals and green *CEN-17* PNA signals. DAPI, blue staining. Scale bar, 10  $\mu\text{m}$ .
