# Supplementary material for: Fast and Non-Toxic In Situ Hybridization without Blocking of Repetitive Sequences
Source: PubMed Central journal article supplement (PMC3404051; doi:10.1371/journal.pone.0040675), 2012-07-24
Supplement: pone.0040675.s005.pdf [file pone.0040675.s005.pdf]

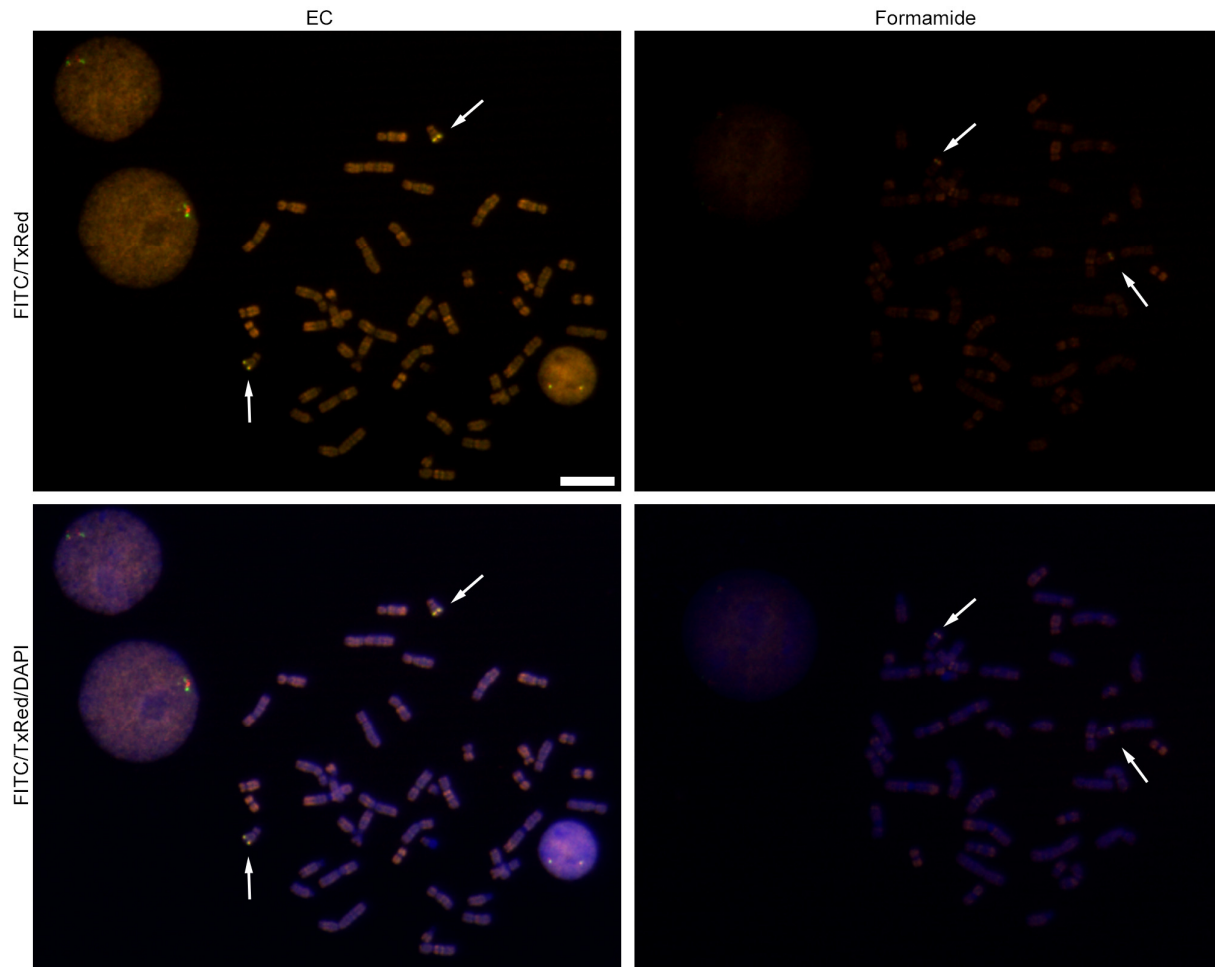

**Figure S5. FISH on metaphases using EC buffer and formamide buffer.** FISH on metaphase spreads using 15% EC buffer without Cot-1 blocking and 45% formamide buffer with Cot-1 blocking.

Denaturation at 82°C for 5 minutes, then hybridization at 45°C for 60 minutes. FITC/TxRed, merge of green and red *BCL2* DNA split probe signals. DAPI, blue staining. Images are taken with identical exposure times. Arrows, show probe location. Scale bar, 10  $\mu$ m.
