# Supplementary material for: Fast and Non-Toxic In Situ Hybridization without Blocking of Repetitive Sequences
Source: PubMed Central journal article supplement (PMC3404051; doi:10.1371/journal.pone.0040675), 2012-07-24
Supplement: pone.0040675.s008.pdf [file pone.0040675.s008.pdf]

**Table S1.** Hansen solubility parameter (HSP) - DNA

| Solvents                | $\delta_D$ | $\delta_P$ | $\delta_H$ | RED   | V (cm <sup>3</sup> /mole) |
|-------------------------|------------|------------|------------|-------|---------------------------|
| 2-pyrrolidone           | 19.4       | 17.4       | 11.3       | 0.249 | 76.4                      |
| Sulfolane               | 20.3       | 18.2       | 10.9       | 0.288 | 95.7                      |
| $\delta$ -valerolactam  | 20.0       | 16.4       | 8.4        | 0.443 | 100.0                     |
| $\gamma$ -butyrolactone | 19.0       | 16.6       | 7.4        | 0.450 | 76.5                      |
| EC                      | 19.4       | 21.7       | 5.1        | 0.563 | 66.0                      |
| Propylene carbonate     | 20.0       | 18.0       | 4.1        | 0.678 | 85.2                      |
| Formamide               | 17.2       | 26.2       | 19.0       | 0.977 | 39.8                      |
| Urea                    | 20.9       | 18.7       | 26.4       | 1.447 | 45.8                      |

Examples of HSP for fast acting hybridization ISH solvents are shown in the table. The calculated solubility sphere for DNA is based on experimental data [29] and was used as an aid to identify possible alternatives to formamide. DNA [18]:  $\delta_D = 19.0$ ;  $\delta_P = 20.0$ ;  $\delta_H = 11.0$ ;  $R_0=11$ ; FIT = 1.000; NO = 12. The HSP are at the center of the sphere.  $R_0$ , the radius of the sphere, suggests the maximum difference in affinity tolerable for a “good” interaction, but there can be boundary uncertainty.  $\delta_D$ ,  $\delta_P$  and  $\delta_H$  account for the cohesion energy density from atomic dispersion interactions, molecular polar interactions and molecular hydrogen-bonding interactions in MPa<sup>1/2</sup>. RED (Relative Energy Difference,  $R_a/R_0$ ) numbers less than 1.0 indicate high affinity; RED numbers equal or close to 1.0 indicate boundary conditions; and progressively higher RED numbers indicate progressively lower affinities. V, molar volume.  $R_a^2 = 4(\delta_{D2}-\delta_{D1})^2 + (\delta_{P2}-\delta_{P1})^2 + (\delta_{H2}-\delta_{H1})^2$ .
