# Supplementary material for: Fast and Non-Toxic In Situ Hybridization without Blocking of Repetitive Sequences
Source: PubMed Central journal article supplement (PMC3404051; doi:10.1371/journal.pone.0040675), 2012-07-24
Supplement: pone.0040675.s009.pdf [file pone.0040675.s009.pdf]

**Table S2.** HSP- Formamide and EC with water

|                                    | $\delta_D$ | $\delta_P$ | $\delta_H$ | $R_0$ |
|------------------------------------|------------|------------|------------|-------|
| Formamide                          | 17.2       | 26.2       | 19.0       | -     |
| Formamide/water 12/88 v/v          | 18.0       | 18.2       | 17.2       | -     |
| EC                                 | 19.4       | 21.7       | 5.1        | -     |
| EC/Water 50/50 v/v                 | 18.7       | 19.3       | 11.0       | -     |
| DNA correlation [18]               | 19.0       | 20.0       | 11.0       | 11.0  |
| Water miscibility correlation [18] | 18.1       | 17.1       | 16.9       | 13.0  |

The optimum amount of formamide in water with regard to affecting DNA is calculated as being 12% v/v. A 10% v/v EC in water is predicted to be better than the optimum 12% v/v for formamide, with further improvements possible up to the optimum at about 50% v/v EC. All units are MPa<sup>1/2</sup>. For definition of parameters see legend of Table S1.
